# Supplementary material for: Ankle fracture classification using deep learning: automating detailed AO Foundation/Orthopedic Trauma Association (AO/OTA) 2018 malleolar fracture identification reaches a high degree of correct classification
Source: PubMed Central journal article supplement (PMC7919919; doi:10.1080/17453674.2020.1837420), 2020-10-26
Supplement: IORT_A_1837420_SM7117.pdf [file IORT_A_1837420_SM7117.pdf]

## Supplementary data

Table 2a. Network

| Layer type      | Blocks | Kernel size | Filters | Group          |
|-----------------|--------|-------------|---------|----------------|
| ResNet block    | 1x2    | 5x5         | 32      | Image          |
| ResNet block    | 1x2    | 3x3         | 64      | Image          |
| ResNet block    | 4x2    | 3x3         | 64      | Core           |
| ResNet block    | 2x2    | 3x3         | 128     | Core           |
| ResNet block    | 2x2    | 3x3         | 256     | Core           |
| ResNet block    | 2x2    | 3x3         | 512     | Core           |
| Image max       | 1      | –           | –       | Pool           |
| Convolutional   | 1      | 1x1         | 72      | Classification |
| Fully connected | 1      | –           | 4       | Classification |
| Fully connected | 1      | –           | 4       | Classification |

Table 2b. Training set-up

| Session         | Epochs | Internal learning rate | Noise (%) | Teacher–student pseudolabels |
|-----------------|--------|------------------------|-----------|------------------------------|
| Initialization  | 70     | 0.025                  | None      | No                           |
| Noise           | 80     | 0.025                  | 5         | No                           |
| Teacher-student | 40     | 0.005                  | 5         | Yes                          |
| Regularization  | 20     | 0.025                  | 10        | No                           |
| SWA             | 20x5   | 0.01                   | 5         | No                           |

Table 2c. Overfitting strategy

| Overfitting strategy                         | Description                                                                                                                                                                                                                                                                                                                                                                                                                                                                                                                                                                                                                                                                                                                                                                 |
|----------------------------------------------|-----------------------------------------------------------------------------------------------------------------------------------------------------------------------------------------------------------------------------------------------------------------------------------------------------------------------------------------------------------------------------------------------------------------------------------------------------------------------------------------------------------------------------------------------------------------------------------------------------------------------------------------------------------------------------------------------------------------------------------------------------------------------------|
| Image jittering                              | Each image was rotated, flipped and randomly cropped during training                                                                                                                                                                                                                                                                                                                                                                                                                                                                                                                                                                                                                                                                                                        |
| Random noise                                 | We employed denoising autoencoder to regularize the visual representation manifold. The decoder and encoder have identical parameters and layers                                                                                                                                                                                                                                                                                                                                                                                                                                                                                                                                                                                                                            |
| Teacher–student network using alternate data | A form of semi-supervised training. A coexisting teacher network was allowed to learn the labels from both the image and the report. This allowed us to use the teacher's labels when images were not labeled. The teacher label's loss was reduced by 10% to avoid flooding the network with bad labels, as these were less certain than the manually labeled images. During the teacher–student session the data set was augmented unlabeled exams using a ratio of 1:2. During all sessions we switched between the ankle dataset and a similarly labeled dataset with wrist images that consisted of 17,511 exams. These were also augmented with unlabeled images with the same proportion between unlabeled and labeled in the ankle dataset (Guillaumin et al. 2010) |
| Stochastic weight averaging (SWA)            | Cosine function for decreasing the learning rate, which was reset between each section of training. Once the learning rate leveled off, we trained for 5 series using stochastic weight averaging (Izmailov et al. 2019)                                                                                                                                                                                                                                                                                                                                                                                                                                                                                                                                                    |
| Active learning                              | Categories that performed poorly during training were actively reviewed during training to ensure accuracy and more examinations were added to improve those categories. Highest entropy over predictions was used as the sampling strategy for active learning                                                                                                                                                                                                                                                                                                                                                                                                                                                                                                             |

We used an untrained ResNet structure consisting of 26 layers. Batch normalization was applied to each convolutional layer and adaptive max. pool. The learning rate followed the cosine function.

**Inter-rater reliability (IRR) results**

IRR between MG and AS for 409 observations. Average Cohen's kappa 0.65

|                  | Cohen's kappa | % identified in the category |            | Agreement |
|------------------|---------------|------------------------------|------------|-----------|
|                  |               | Reviewer 1                   | Reviewer 2 |           |
| <b>General</b>   |               |                              |            |           |
| Fracture         | 1.00          | 78                           | 78         | 100       |
| Malleolar        | 0.91          | 53                           | 51         | 95        |
| Tibia diaphyseal | 0.57          | 7                            | 3          | 96        |
| Tibia distal     | 0.91          | 15                           | 14         | 98        |
| Fibula           | 0.84          | 9                            | 9          | 98        |
| Other bone       | 0.81          | 10                           | 7          | 97        |
| <b>Malleolar</b> |               |                              |            |           |
| A                | 0.63          | 9                            | 5          | 95        |
| B                | 0.82          | 33                           | 35         | 92        |
| C                | 0.73          | 10                           | 11         | 95        |
| A1               | 0.70          | 6                            | 4          | 97        |
| B1               | 0.63          | 17                           | 11         | 91        |
| B1.1             | 0.48          | 11                           | 7          | 91        |
| B1.2             | 0.22          | 6                            | 4          | 93        |
| B1.1 or B1.2     | 0.63          | 16                           | 11         | 91        |
| B3               | 0.51          | 9                            | 6          | 93        |
| C1               | 0.46          | 6                            | 5          | 94        |
| C2               | 0.55          | 3                            | 5          | 96        |
| C3               | 0.28          | 1                            | 1          | 99        |

IRR between MG and TA for 388 observations. Average Cohen's kappa 0.60

|                  | Cohen's kappa | % identified in the category |            | Agreement |
|------------------|---------------|------------------------------|------------|-----------|
|                  |               | Reviewer 1                   | Reviewer 2 |           |
| <b>General</b>   |               |                              |            |           |
| Fracture         | 1.00          | 74                           | 74         | 100       |
| Malleolar        | 0.64          | 44                           | 60         | 82        |
| Tibia diaphyseal | 0.60          | 4                            | 2          | 98        |
| Tibia distal     | 0.88          | 8                            | 8          | 98        |
| Fibula           | 0.56          | 4                            | 3          | 97        |
| Other bone       | 0.72          | 7                            | 8          | 96        |
| <b>Malleolar</b> |               |                              |            |           |
| A                | 0.48          | 8                            | 18         | 88        |
| B                | 0.72          | 28                           | 39         | 87        |
| C                | 0.45          | 8                            | 3          | 94        |
| A1               | 0.49          | 7                            | 15         | 90        |
| B1               | 0.61          | 14                           | 21         | 89        |
| B1.1             | 0.52          | 9                            | 15         | 90        |
| B1.2             | 0.26          | 4                            | 3          | 95        |
| B1.1 or B1.2     | 0.64          | 13                           | 18         | 90        |
| B3               | 0.69          | 7                            | 8          | 96        |
| C1               | 0.30          | 6                            | 1          | 95        |
| C2               | 0.61          | 2                            | 1          | 99        |
| C3               | 0.67          | 0                            | 1          | 100       |

IRR between MG and AI for 409 observations. Average Cohen's kappa 0.52

|                  | Cohen's kappa | % identified in the category |            | Agreement |
|------------------|---------------|------------------------------|------------|-----------|
|                  |               | Reviewer 1                   | Reviewer 2 |           |
| <b>General</b>   |               |                              |            |           |
| Fracture         | 0.75          | 78                           | 72         | 91        |
| Malleolar        | 0.85          | 53                           | 50         | 93        |
| Tibia diaphyseal | 0.50          | 7                            | 17         | 89        |
| Tibia distal     | 0.79          | 15                           | 16         | 94        |
| Fibula           | 0.53          | 9                            | 16         | 90        |
| Other bone       | 0.72          | 10                           | 12         | 95        |
| <b>Malleolar</b> |               |                              |            |           |
| A                | 0.54          | 9                            | 7          | 93        |
| B                | 0.71          | 33                           | 38         | 87        |
| C                | 0.48          | 10                           | 8          | 91        |
| A1               | 0.42          | 6                            | 12         | 90        |
| B1               | 0.67          | 17                           | 19         | 90        |
| B1.1             | 0.57          | 11                           | 15         | 90        |
| B1.2             | 0.05          | 6                            | 4          | 91        |
| B1.1 or B1.2     | 0.67          | 16                           | 18         | 91        |
| B3               | 0.44          | 9                            | 9          | 91        |
| C1               | 0.15          | 6                            | 6          | 90        |
| C2               | 0.17          | 3                            | 13         | 87        |
| C3               | 0.40          | 1                            | 0          | 99        |

IRR between AS and AI for 409 observations. Average Cohen's kappa 0.45

|                  | Cohen's kappa | % identified in the category |            | Agreement |
|------------------|---------------|------------------------------|------------|-----------|
|                  |               | Reviewer 1                   | Reviewer 2 |           |
| <b>General</b>   |               |                              |            |           |
| Fracture         | 0.75          | 78                           | 72         | 91        |
| Malleolar        | 0.84          | 51                           | 50         | 92        |
| Tibia diaphyseal | 0.25          | 3                            | 17         | 86        |
| Tibia distal     | 0.75          | 14                           | 16         | 94        |
| Fibula           | 0.55          | 9                            | 16         | 90        |
| Other bone       | 0.63          | 7                            | 12         | 94        |
| <b>Malleolar</b> |               |                              |            |           |
| A                | 0.41          | 5                            | 7          | 93        |
| B                | 0.70          | 35                           | 38         | 86        |
| C                | 0.34          | 11                           | 8          | 89        |
| A1               | 0.26          | 4                            | 12         | 89        |
| B1               | 0.57          | 11                           | 19         | 89        |
| B1.1             | 0.46          | 7                            | 15         | 89        |
| B1.2             | 0.27          | 4                            | 4          | 94        |
| B1.1 or B1.2     | 0.59          | 11                           | 18         | 90        |
| B3               | 0.38          | 6                            | 9          | 91        |
| C1               | 0.22          | 5                            | 6          | 92        |
| C2               | 0.18          | 5                            | 13         | 86        |
| C3               | 0.00          | 1                            | 0          | 99        |

**Other fracture classes**

**Fibular fracture. The outcome measures for the most important groups**

|               | Cases<br>n = 409 | Sensitivity<br>(%) | Specificity<br>(%) | Youden's J | AUC (95% CI)     |
|---------------|------------------|--------------------|--------------------|------------|------------------|
| General       | 37               | 92                 | 79                 | 0.71       | 0.91 (0.85–0.96) |
| 2             | 5                | 100                | 38                 | 0.38       | 0.67 (0.45–0.90) |
| 3             | 32               | 97                 | 86                 | 0.83       | 0.94 (0.92–0.97) |
| 3A            | 16               | 94                 | 78                 | 0.72       | 0.90 (0.85–0.96) |
| 3B            | 16               | 100                | 77                 | 0.77       | 0.94 (0.90–0.98) |
| Weighted mean |                  | 94                 | 79                 | 0.73       | 0.90             |

**Tibia diaphysis fractures. The outcome measures for the most important groups**

|               | Cases<br>n = 409 | Sensitivity<br>(%) | Specificity<br>(%) | Youden's J | AUC (95% CI)     |
|---------------|------------------|--------------------|--------------------|------------|------------------|
| General       | 27               | 93                 | 89                 | 0.82       | 0.95 (0.92–0.98) |
| Base          | 16               | 94                 | 84                 | 0.77       | 0.94 (0.90–0.97) |
| 1             | 16               | 100                | 87                 | 0.87       | 0.94 (0.91–0.97) |
| Base          | 7                | 86                 | 88                 | 0.73       | 0.84 (0.61–0.97) |
| 2             | 7                | 86                 | 84                 | 0.70       | 0.91 (0.82–0.97) |
| Weighted mean |                  | 93                 | 87                 | 0.80       | 0.93             |

**Tibial distal fracture. The outcome measures for the most important groups**

|               | Cases<br>n = 409 | Sensitivity<br>(%) | Specificity<br>(%) | Youden's J | AUC (95% CI)     |
|---------------|------------------|--------------------|--------------------|------------|------------------|
| General       | 65               | 79                 | 90                 | 0.69       | 0.90 (0.85–0.94) |
| Base          | 14               | 100                | 77                 | 0.77       | 0.92 (0.88–0.96) |
| 1             | 8                | 100                | 88                 | 0.88       | 0.93 (0.90–0.96) |
| 1.1           | 8                | 100                | 78                 | 0.78       | 0.91 (0.85–0.96) |
| 2             | 4                | 100                | 91                 | 0.91       | 0.95 (0.92–0.98) |
| Base          | 8                | 100                | 59                 | 0.59       | 0.87 (0.73–0.98) |
| 1             | 8                | 100                | 64                 | 0.64       | 0.87 (0.76–0.98) |
| 1.1           | 6                | 100                | 63                 | 0.63       | 0.85 (0.70–0.97) |
| 1.2           | 2                | 100                | 95                 | 0.95       | 0.97 (0.93–1.00) |
| Base          | 16               | 94                 | 83                 | 0.77       | 0.92 (0.87–0.96) |
| Weighted mean |                  | 90                 | 83                 | 0.72       | 0.90             |

**Foot fractures. The outcome measures for the most important groups**

|               | Cases<br>n = 409 | Sensitivity<br>(%) | Specificity<br>(%) | Youden's J | AUC (95% CI)     |
|---------------|------------------|--------------------|--------------------|------------|------------------|
| General       | 40               | 77                 | 70                 | 0.47       | 0.83 (0.75–0.89) |
| Calcaneus     | 17               | 76                 | 94                 | 0.70       | 0.90 (0.80–0.97) |
| Metatarsale   | 17               | 93                 | 62                 | 0.55       | 0.77 (0.70–0.85) |
| Metatars. V   | 14               | 91                 | 66                 | 0.57       | 0.78 (0.69–0.86) |
| Naviculare    | 3                | 100                | 86                 | 0.86       | 0.92 (0.84–0.98) |
| Talus         | 4                | 100                | 76                 | 0.76       | 0.90 (0.79–0.98) |
| Weighted mean |                  | 84                 | 73                 | 0.56       | 0.83             |
